# Supplementary material
Source: PubMed Central journal article supplement (PMC3444990)
Supplement: iep0093-0341-SD4.pdf [file iep0093-0341-SD4.pdf]

**B****co-regulated**

| Symbol | Gene name                                                              | PCR | FaDu |
|--------|------------------------------------------------------------------------|-----|------|
| SFRP5  | secreted frizzled-related protein 5;SFRP5                              | x   | x    |
| PCDH10 | protocadherin 10;PCDH10                                                | x   |      |
| DKK2   | dickkopf homolog 2 ( <i>Xenopus laevis</i> ); DKK2                     | x   | x    |
| MMP24  | matrix metalloproteinase 24 (membrane-inserted);MMP24                  | x   | x    |
| SPARC  | secreted protein, acidic, cysteine-rich (osteonectin); SPARC           | x   | x    |
| MYST3  | MYST histone acetyltransferase (monocytic leukemia) 3;MYST3            | x   | -    |
| ErbB4  | v-erb-a erythroblastic leukemia viral oncogene homolog 4 (avian);ERBB4 |     |      |
| MMP12  | matrix metalloproteinase 12 (macrophage elastase); MMP12               | x   | x    |
| WISP2  | WNT1 inducible signaling pathway protein 2;WISP2                       | x   | x    |
| MMP7   | matrix metalloproteinase 7 (matrilysin, uterine);MMP7                  | x   | x    |
| NANOS1 | nanos homolog 1 ( <i>Drosophila</i> ); NANOS1                          | x   | x    |
| Wnt9a  | wingless-type MMTV integration site family, member 9A;WNT9A            | x   | x    |

**counter-regulated**

|         |                                                                               |   |   |
|---------|-------------------------------------------------------------------------------|---|---|
|         |                                                                               |   |   |
| MMP11   | matrix metalloproteinase 11 (stromelysin 3); MMP11                            | x | x |
| FN1     | fibronectin 1                                                                 | x | x |
| DACT3   | dapper, antagonist of beta-catenin, homolog 3 ( <i>Xenopus laevis</i> );DACT3 | x | x |
| WNT2B   | wingless-type MMTV integration site family, member 2B;WNT2B                   |   |   |
| WNT5A   | wingless-type MMTV integration site family, member 5A;WNT5A                   | x | x |
| APC2    | adenomatous polyposis coli 2;APC2                                             | x | x |
| Spondin | spondin 1, extracellular matrix protein; SPON1                                | x | x |
| CTNNA2  | catenin (cadherin-associated protein), alpha 2;CTNNA2                         |   |   |

**Suppl. Figure 1B**  
**Denzel et al. (2012)**
