# Supplementary material
Source: PubMed Central journal article supplement (PMC3444990)

A

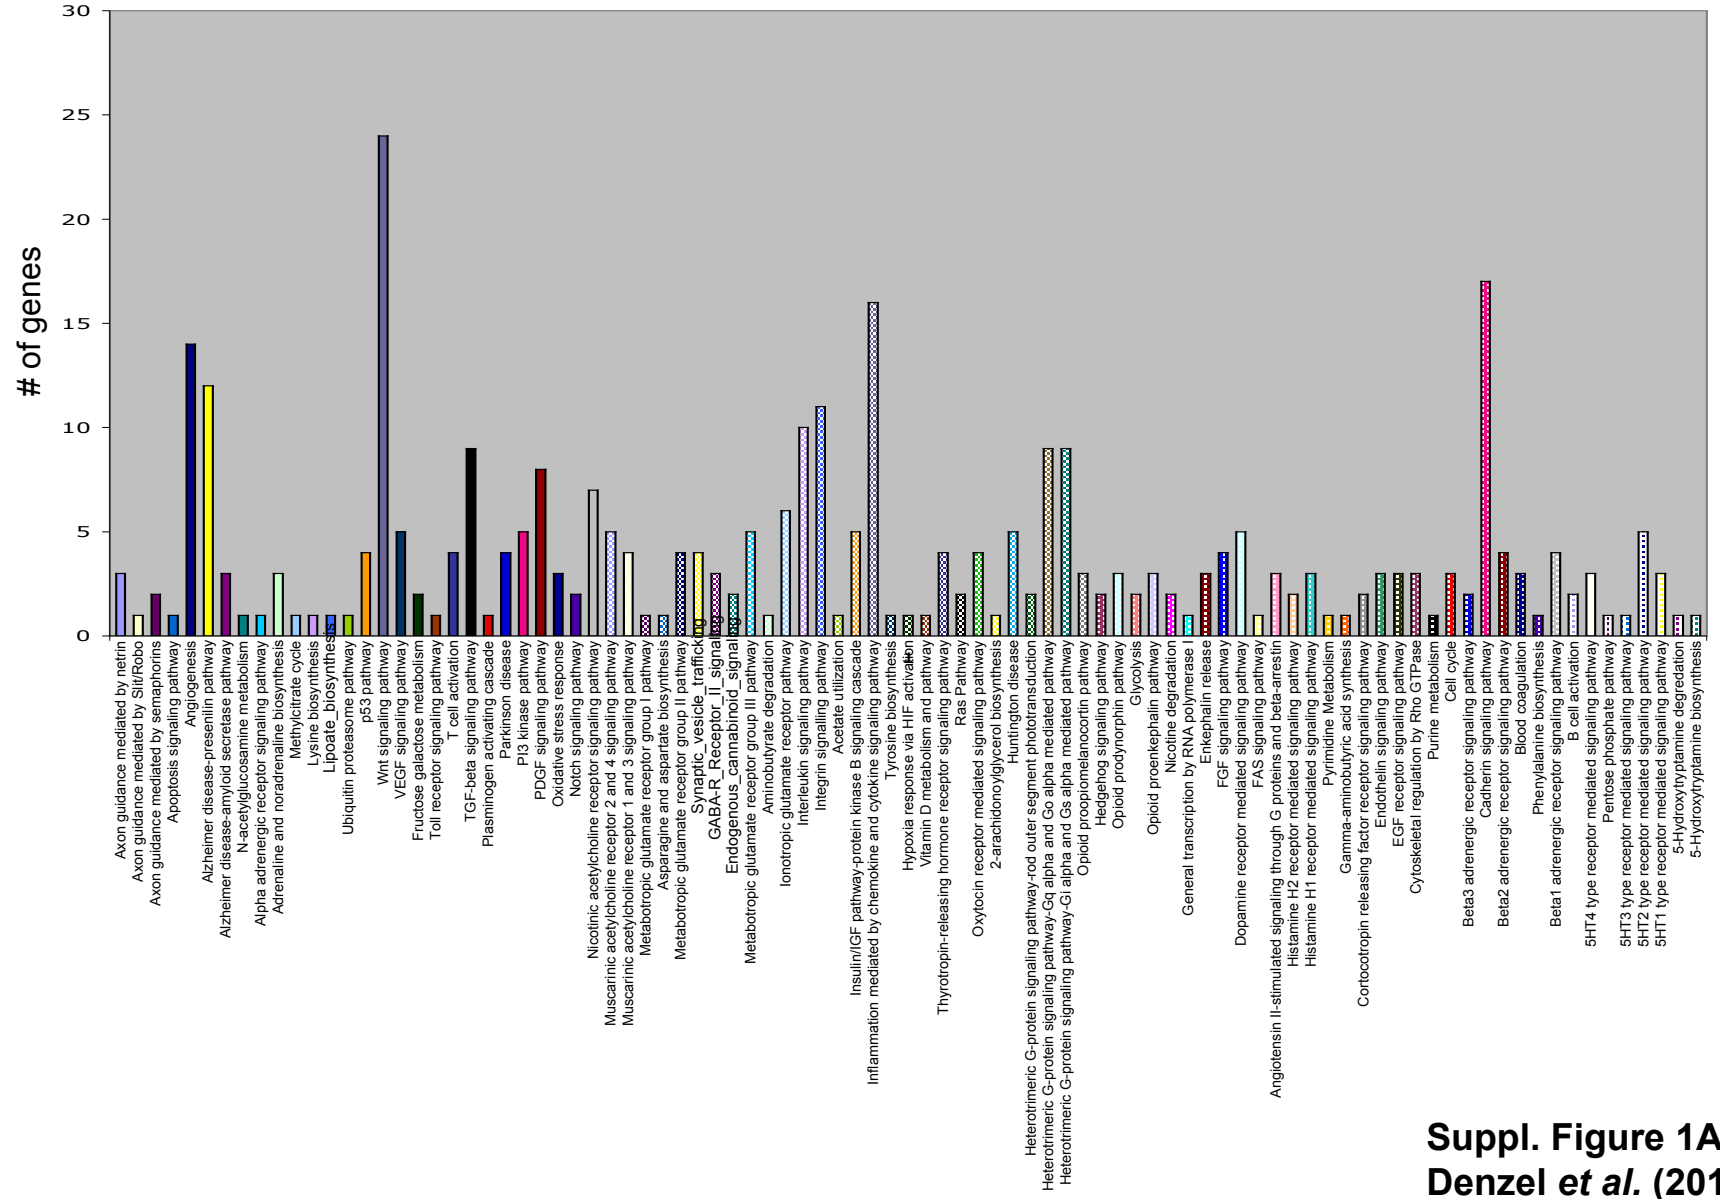

Suppl. Figure 1A  
Denzel et al. (2012)

Supplement: iep0093-0341-SD1.pdf [file iep0093-0341-SD1.pdf]

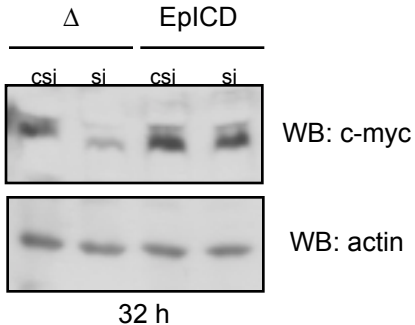

**Suppl. Figure 2**  
**Denzel *et al.* (2012)**

Supplement: iep0093-0341-SD2.pdf [file iep0093-0341-SD2.pdf]

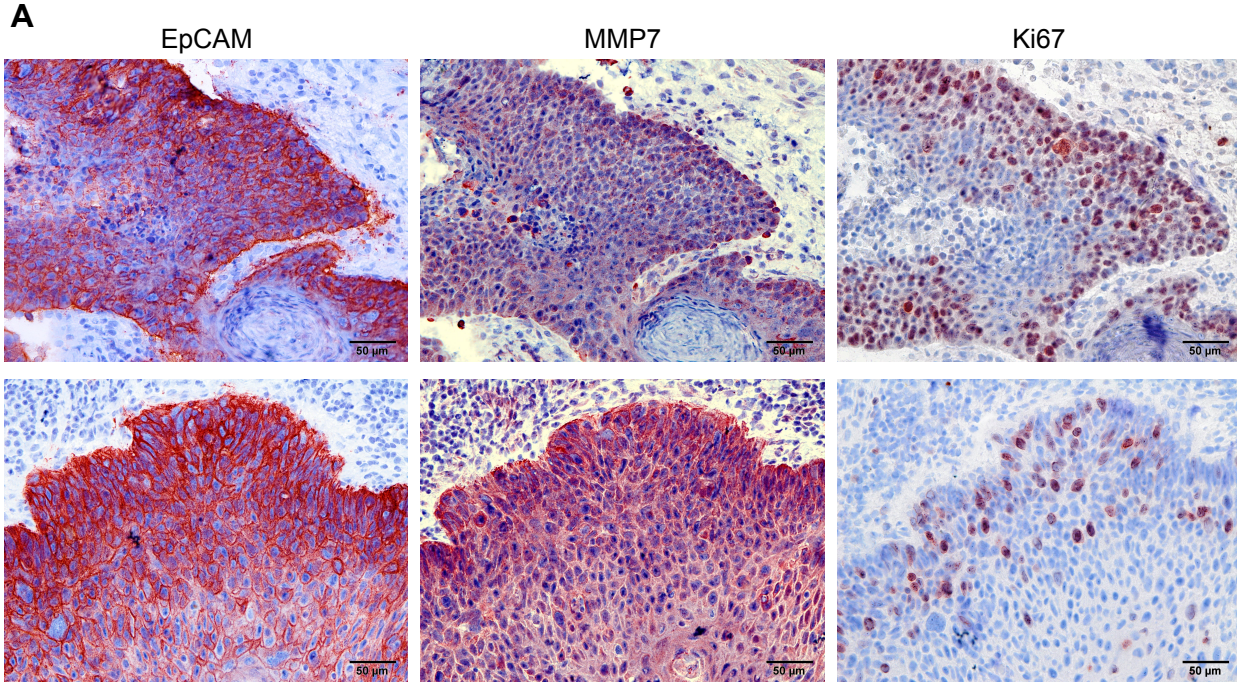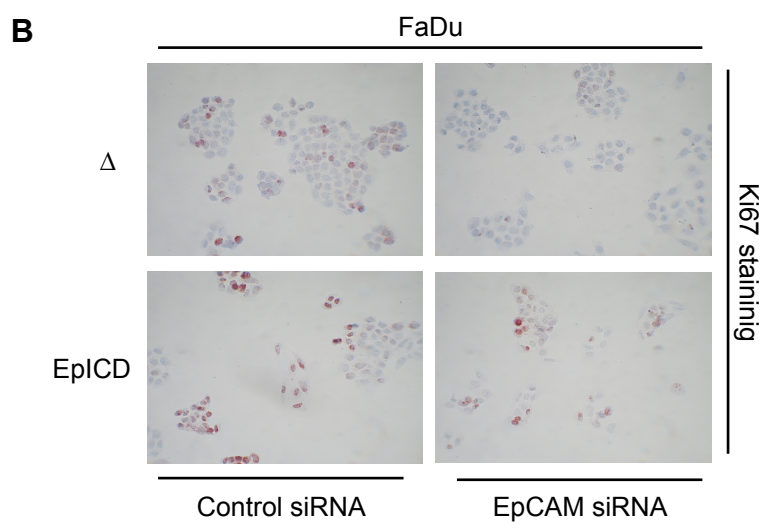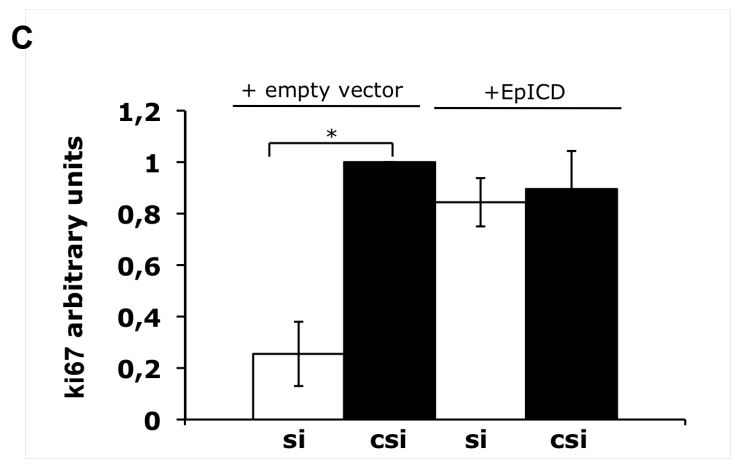

**Suppl. Figure 3**  
**Denzel et al. (2012)**

Supplement: iep0093-0341-SD3.pdf [file iep0093-0341-SD3.pdf]
